# Supplementary material for: Ticks and Tick-Borne Pathogens Associated with Dromedary Camels (Camelus dromedarius) in Northern Kenya
Source: MDPI journal article supplement (doi:10.3390/microorganisms9071414), 2021-06-30
Supplement: s1 [file s1]

**Table S2:** Minimum infection rates for TBP identified in ticks and camel blood samples according to sampling sites in Marsabit, northern Kenya, February-March 2020.

| Location | Host                  | No. of individuals | No. of pools | <i>Coxiella burnetii</i> | <i>Coxiella</i> endo-symbionts | <i>Candidatus Anaplasma camelii</i> | <i>Anaplasma</i> sp. | <i>Candidatus Ehrlichia regneryi</i> | <i>Ehrlichia ruminantium</i> | <i>Ehrlichia chaffeensis</i> | <i>Ehrlichia</i> sp. | <i>Rickettsia africae</i> | <i>Rickettsia aeschlimannii</i> | <i>Paracoccus</i> sp. |
|----------|-----------------------|--------------------|--------------|--------------------------|--------------------------------|-------------------------------------|----------------------|--------------------------------------|------------------------------|------------------------------|----------------------|---------------------------|---------------------------------|-----------------------|
| Laisamis | <i>Hy. dromedarii</i> | 320                | 76           | 4 (1.4%)                 |                                | 9 (2.8%)                            |                      | 8 (2.5%)                             |                              |                              |                      |                           | 1 (0.3%)                        | 2 (0.6%)              |
|          | <i>Hy. rufipes</i>    | 364                | 96           | 6 (1.6%)                 |                                | 14 (3.8%)                           |                      | 13 (3.6%)                            |                              |                              |                      |                           | 23 (6.3%)                       | 8 (2.2%)              |
|          | <i>Hy. impeltatum</i> | 39                 | 14           |                          |                                | 1 (2.6%)                            |                      | 2 (5.1%)                             |                              |                              |                      |                           |                                 |                       |
|          | <i>Hy. truncatum</i>  | 3                  | 2            |                          |                                |                                     |                      |                                      |                              |                              |                      |                           |                                 | 1 (33.3%)             |
|          | <i>Rh. camicasi</i>   | 23                 | 8            |                          |                                | 2 (8.7%)                            |                      |                                      |                              |                              |                      |                           |                                 |                       |
|          | Camel blood           | 56                 |              | 1 (1.8%)                 |                                | 52 (92.9%)                          |                      | 9 (16.1%)                            |                              |                              |                      |                           |                                 |                       |
| Kamboe   | <i>Hy. dromedarii</i> | 17                 | 7            |                          |                                | 2 (11.8%)                           |                      | 1 (5.9)                              |                              |                              |                      |                           |                                 |                       |
|          | <i>Hy. rufipes</i>    | 13                 | 8            |                          |                                | 2 (15.4%)                           |                      | 2 (15.4%)                            |                              |                              |                      |                           |                                 |                       |
|          | <i>Am. gemma</i>      | 19                 | 12           |                          | 1 (5.3%)                       | 2 (10.5%)                           |                      |                                      | 2 (10.5%)                    |                              |                      | 1 (5.3%)                  |                                 |                       |
|          | <i>Rh. pulchellus</i> | 19                 | 11           | 1 (5.3%)                 |                                | 3 (15.8%)                           |                      |                                      |                              |                              | 9 (47.4%)            |                           | 1 (5.3%)                        | 1 (5.3%)              |
|          | <i>Hy. truncatum</i>  | 2                  | 1            |                          |                                |                                     |                      |                                      |                              |                              |                      |                           |                                 |                       |
|          | Camel blood           | 16                 |              |                          |                                | 16 (100%)                           |                      | 1 (6.3%)                             |                              |                              |                      |                           |                                 |                       |
| Shegel   | <i>Hy. dromedarii</i> | 179                | 34           | 5 (2.8%)                 |                                | 2 (1.1%)                            |                      | 2 (1.1%)                             |                              |                              |                      |                           |                                 |                       |
|          | <i>Hy. impeltatum</i> | 145                | 36           |                          |                                | 5 (3.4%)                            |                      | 3 (2.1%)                             |                              |                              |                      |                           | 5 (3.4%)                        | 2 (1.4%)              |
|          | <i>Hy. rufipes</i>    | 87                 | 27           | 3 (3.4%)                 |                                | 4 (4.6%)                            |                      | 5 (5.7%)                             |                              |                              |                      |                           | 9 (10.3%)                       |                       |
|          | <i>Hy. truncatum</i>  | 13                 | 4            |                          |                                | 1 (7.7%)                            |                      |                                      |                              |                              |                      |                           |                                 |                       |
|          | <i>Rh. camicasi</i>   | 38                 | 10           |                          |                                | 3 (7.9%)                            |                      |                                      |                              |                              |                      |                           |                                 |                       |
|          | <i>Am. gemma</i>      | 3                  | 3            |                          |                                |                                     |                      |                                      |                              |                              |                      |                           |                                 |                       |
|          | <i>Am. lepidum</i>    | 3                  | 3            |                          |                                |                                     |                      |                                      | 1 (33.3%)                    |                              |                      |                           |                                 |                       |
|          | Camel blood           | 24                 |              | 1 (4.2%)                 |                                | 20 (83.3%)                          |                      | 3 (12.5%)                            |                              |                              |                      |                           |                                 |                       |
| Korr     | <i>Hy. dromedarii</i> | 163                | 40           | 2 (1.2%)                 |                                |                                     |                      | 3 (7.5%)                             |                              |                              |                      |                           | 1 (0.6%)                        |                       |
|          | <i>Hy. impeltatum</i> | 37                 | 13           |                          |                                |                                     |                      | 1 (0.7%)                             |                              |                              |                      |                           | 1 (2.7%)                        |                       |
|          | <i>Hy. rufipes</i>    | 145                | 43           | 3 (2.1%)                 |                                | 1 (0.7%)                            |                      | 9 (20.9%)                            |                              |                              | 1 (0.7%)             |                           | 22 (15.2%)                      |                       |
|          | <i>Rh. pulchelus</i>  | 2                  | 1            |                          |                                |                                     |                      |                                      |                              |                              |                      |                           |                                 |                       |
|          | Camel blood           | 56                 |              | 7 (12.5%)                |                                | 49 (87.5%)                          |                      | 13 (23.2%)                           |                              |                              |                      |                           |                                 |                       |
| Dabel    | <i>Hy. dromedarii</i> | 124                | 25           |                          |                                | 6 (4.8%)                            |                      | 3 (2.4%)                             |                              |                              |                      |                           |                                 |                       |
|          | <i>Hy. rufipes</i>    | 39                 | 15           |                          |                                | 2 (5.1%)                            |                      | 5 (12.8%)                            |                              |                              |                      |                           | 8 (20.5%)                       |                       |
|          | <i>Am. gemma</i>      | 8                  | 8            |                          | 1 (12.5%)                      | 1 (12.5%)                           |                      |                                      | 4 (50%)                      |                              |                      | 2 (25%)                   |                                 | 1 (12.5%)             |
|          | <i>Am. lepidum</i>    | 41                 | 20           |                          | 3 (7.3%)                       | 2 (4.9%)                            |                      |                                      | 4 (9.8%)                     |                              |                      | 3 (7.3%)                  |                                 |                       |
|          | <i>Rh. pulchellus</i> | 28                 | 17           |                          | 2 (7.1%)                       | 3 (10.7%)                           |                      |                                      |                              |                              | 5 (17.9%)            |                           |                                 |                       |
|          | Camel blood           | 24                 |              |                          |                                | 15 (62.5%)                          |                      | 4 (16.7%)                            |                              |                              |                      |                           |                                 |                       |
| Yaballo  | <i>Hy. dromedarii</i> | 37                 | 13           |                          |                                | 3 (8.1%)                            |                      | 1 (2.7%)                             |                              |                              |                      |                           | 1 (2.7%)                        |                       |
|          | <i>Hy. rufipes</i>    | 22                 | 10           |                          |                                | 2 (9.1%)                            |                      | 7 (31.8%)                            |                              |                              |                      |                           | 3 (13.6%)                       |                       |
|          | <i>Am. gemma</i>      | 26                 | 16           |                          | 1 (3.8%)                       | 2 (7.7%)                            |                      |                                      | 4 (15.4%)                    |                              |                      | 6 (23.1%)                 |                                 |                       |

[illegible]

|  |                       |   |   |  |  |           |  |  |  |  |  |  |  |  |
|--|-----------------------|---|---|--|--|-----------|--|--|--|--|--|--|--|--|
|  | <i>Hy. truncatum</i>  | 1 | 1 |  |  |           |  |  |  |  |  |  |  |  |
|  | <i>Rh. pulchellus</i> | 3 | 1 |  |  |           |  |  |  |  |  |  |  |  |
|  | Camel blood           | 8 |   |  |  | 7 (87.5%) |  |  |  |  |  |  |  |  |
