# Supplementary material for: Ticks and Tick-Borne Pathogens Associated with Dromedary Camels (Camelus dromedarius) in Northern Kenya
Source: MDPI journal article supplement (doi:10.3390/microorganisms9071414), 2021-06-30
Supplement: s1 [file s1]

**Table S3:** Numbers of sampled camels and sheep with the same TBPs in ticks and blood, or in ticks or blood only, Marsabit, northern Kenya, February-March 2020.

| Camels (n =296)                      |                                 |                    |                    |
|--------------------------------------|---------------------------------|--------------------|--------------------|
| Bacterial species                    | Same TBPs in ticks and in blood | TBPs in ticks only | TBPs in blood only |
| <i>Ehrlichia ruminantium</i>         | -                               | 31 (10.5%)         | -                  |
| <i>Ehrlichia chaffeensis</i>         | -                               | 2 (0.7%)           | -                  |
| <i>Candidatus Ehrlichia regneryi</i> | 10 (3.4%)                       | 40 (13.5%)         | 37 (12.5%)         |
| <i>Ehrlichia</i> spp.                | -                               | 16 (5.4%)          | -                  |
| <i>Candidatus Anaplasma camelii</i>  | 63 (21.3%)                      | 18 (6.1%)          | 170 (57.4%)        |
| <i>Anaplasma</i> spp                 | -                               | 1 (0.3%)           | -                  |
| <i>Rickettsia africae</i>            | -                               | 32 (10.8%)         | -                  |
| <i>Rickettsia aeschlimannii</i>      | -                               | 56 (18.9%)         | -                  |
| <i>Coxiella burnetii</i>             | 1 (0.3%)                        | 20 (6.8%)          | 9 (3.0%)           |
| <i>Coxiella endosymbionts</i>        | -                               | 26 (8.8%)          | -                  |
| Sheep (n = 77)                       |                                 |                    |                    |
| <i>Ehrlichia ruminantium</i>         | -                               | 3 (3.9%)           | 1 (1.3%)           |
| <i>Ehrlichia chaffeensis</i>         | -                               | -                  | 1 (1.3%)           |
| <i>Candidatus Anaplasma camelii</i>  | -                               | 1 (1.3%)           | -                  |
| <i>Anaplasma ovis</i>                | 5 (6.5%)                        | 3 (3.9%)           | 63 (81.8%)         |
| <i>Rickettsia africae</i>            | -                               | 3 (3.9%)           | -                  |
| <i>Theileria ovis</i>                | 1 (1.3%)                        | -                  | 61 (79.2%)         |
